# Supplementary material for: Rough Notes on Programming AVR Microcontrollers in C
Source: MDPI journal article supplement (doi:10.3390/biology12050734), 2007-01-01
Supplement: s1 [file s1]

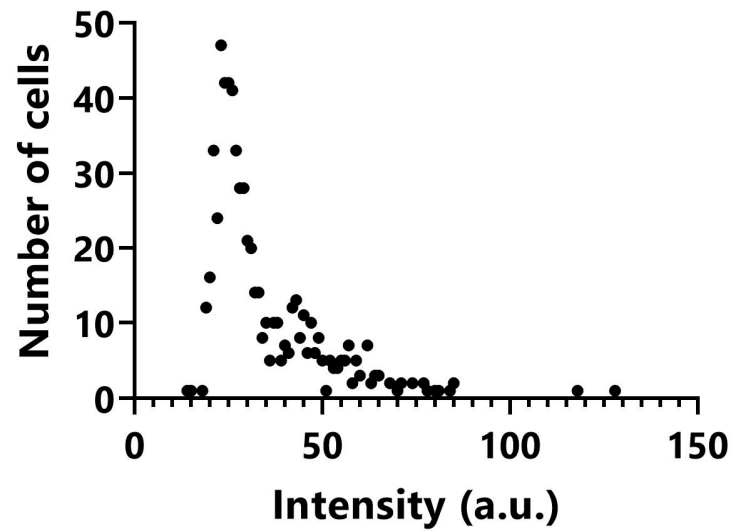

**Figure S2.** Distribution of fluorescent intensity of  $\gamma$ -H2AX in the unirradiated control cells. The fluorescent intensity was  $35.01 \pm 13.95$ . We determined that the cells with fluorescent intensity was higher than 48.96 (average +  $\sigma$ ) were bystander cells in the irradiated dishes.
