# Supplementary material for: Rough Notes on Programming AVR Microcontrollers in C
Source: MDPI journal article supplement (doi:10.3390/biology12050734), 2007-01-01
Supplement: s1 [file s1]

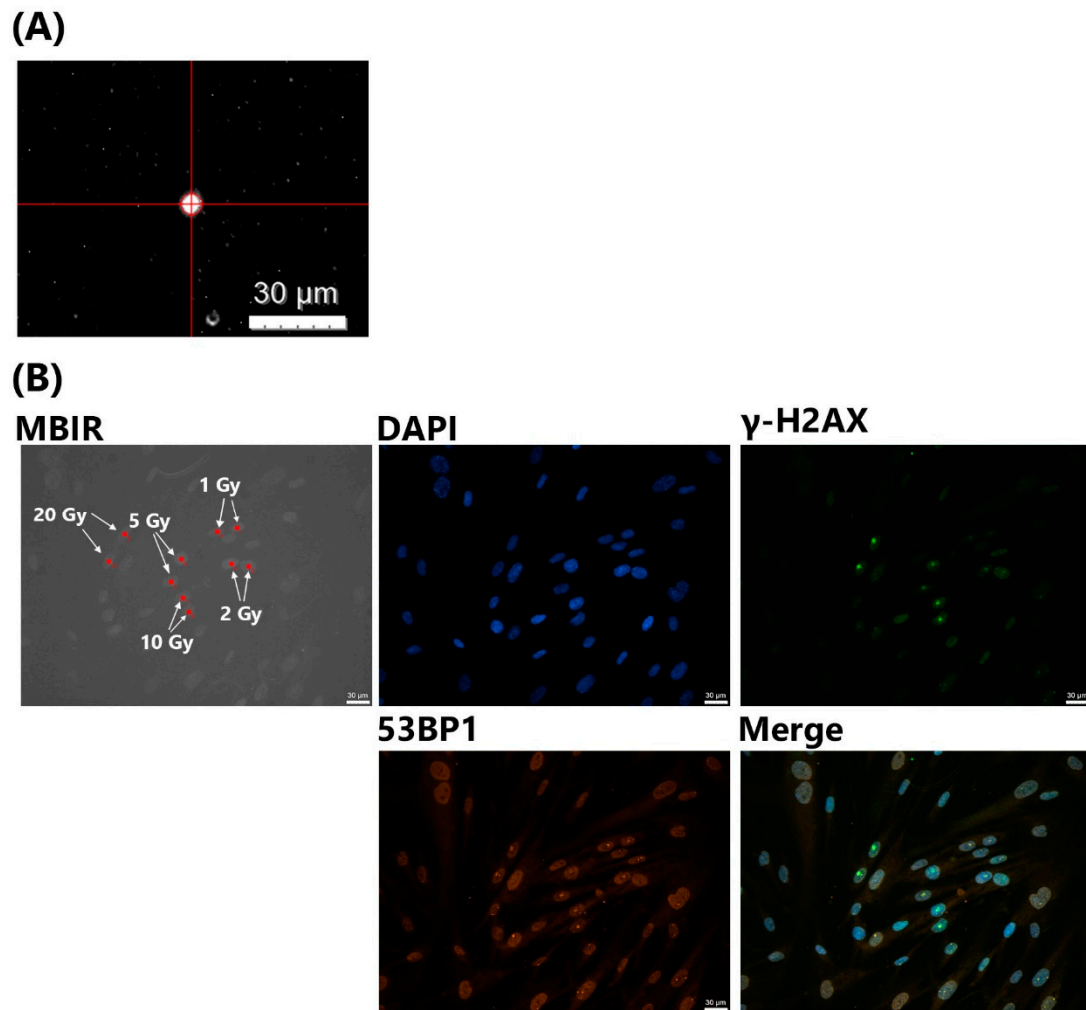

**Figure S1.** Accumulation of 53BP1 and  $\gamma$ -H2AX foci in the nuclei of WI-38 cells irradiated with Al $\kappa$  X-ray microbeams. (A) An image of Al $\kappa$  X-ray microbeams visualized with the scintillator. Bar represents 30  $\mu$ m. (B) Co-localization of 53BP1 and  $\gamma$ -H2AX foci in WI-38 cells irradiated with Al $\kappa$  X-ray at doses 1–20 Gy of microbeams. MBIR (microbeam irradiation) is a fluorescent image captured at the time of microbeam irradiation. Before irradiation, cell nuclei were stained with Hoechst 33258 solution for target irradiation of cell nuclei. The red squares are the irradiation positions set by the irradiation software. Cells were fixed 30 minutes after irradiation, followed by immunofluorescence. Bars represent 30  $\mu$ m.
